# Supplementary material for: Development of an mRNA-lipid nanoparticle vaccine against Lyme disease
Source: PubMed Central journal article supplement — Mol Ther. 2023 Aug 2;31(9):2702–14. doi: 10.1016/j.ymthe.2023.07.022 (PMC10492027; doi:10.1016/j.ymthe.2023.07.022), 2023-08-02
Supplement: mmc1.pdf [file mmc1.pdf]

**Supplemental information**

**Development of an mRNA-lipid nanoparticle  
vaccine against Lyme disease**

**Matthew Pine, Gunjan Arora, Thomas M. Hart, Emily Bettini, Brian T. Gaudette, Hiromi Muramatsu, István Tombácz, Taku Kambayashi, Ying K. Tam, Dustin Brisson, David Allman, Michela Locci, Drew Weissman, Erol Fikrig, and Norbert Pardi**

## Supplemental Information

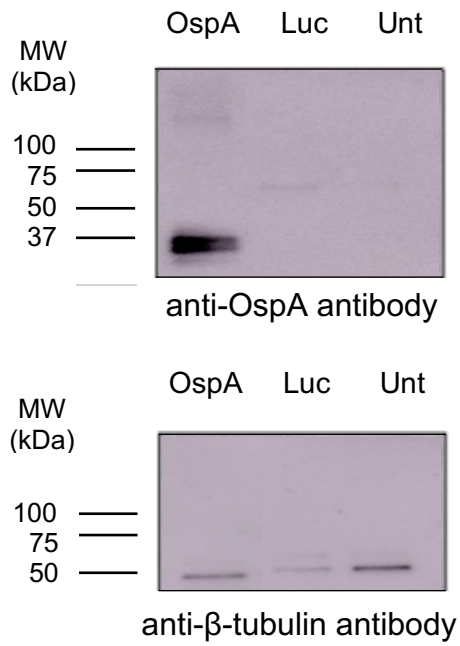

**Figure S1. Protein production from OspA mRNA *in vitro*.** Neuro 2-a cells were transfected with OspA- or Luc-encoding mRNAs. OspA protein expression in whole-cell lysate was detected by Western blot, utilizing untransfected cells (Unt) and Luc mRNA-transfected cells as negative controls. Membrane was stripped and re-probed with anti-beta tubulin antibody as a loading control. MW: molecular weight

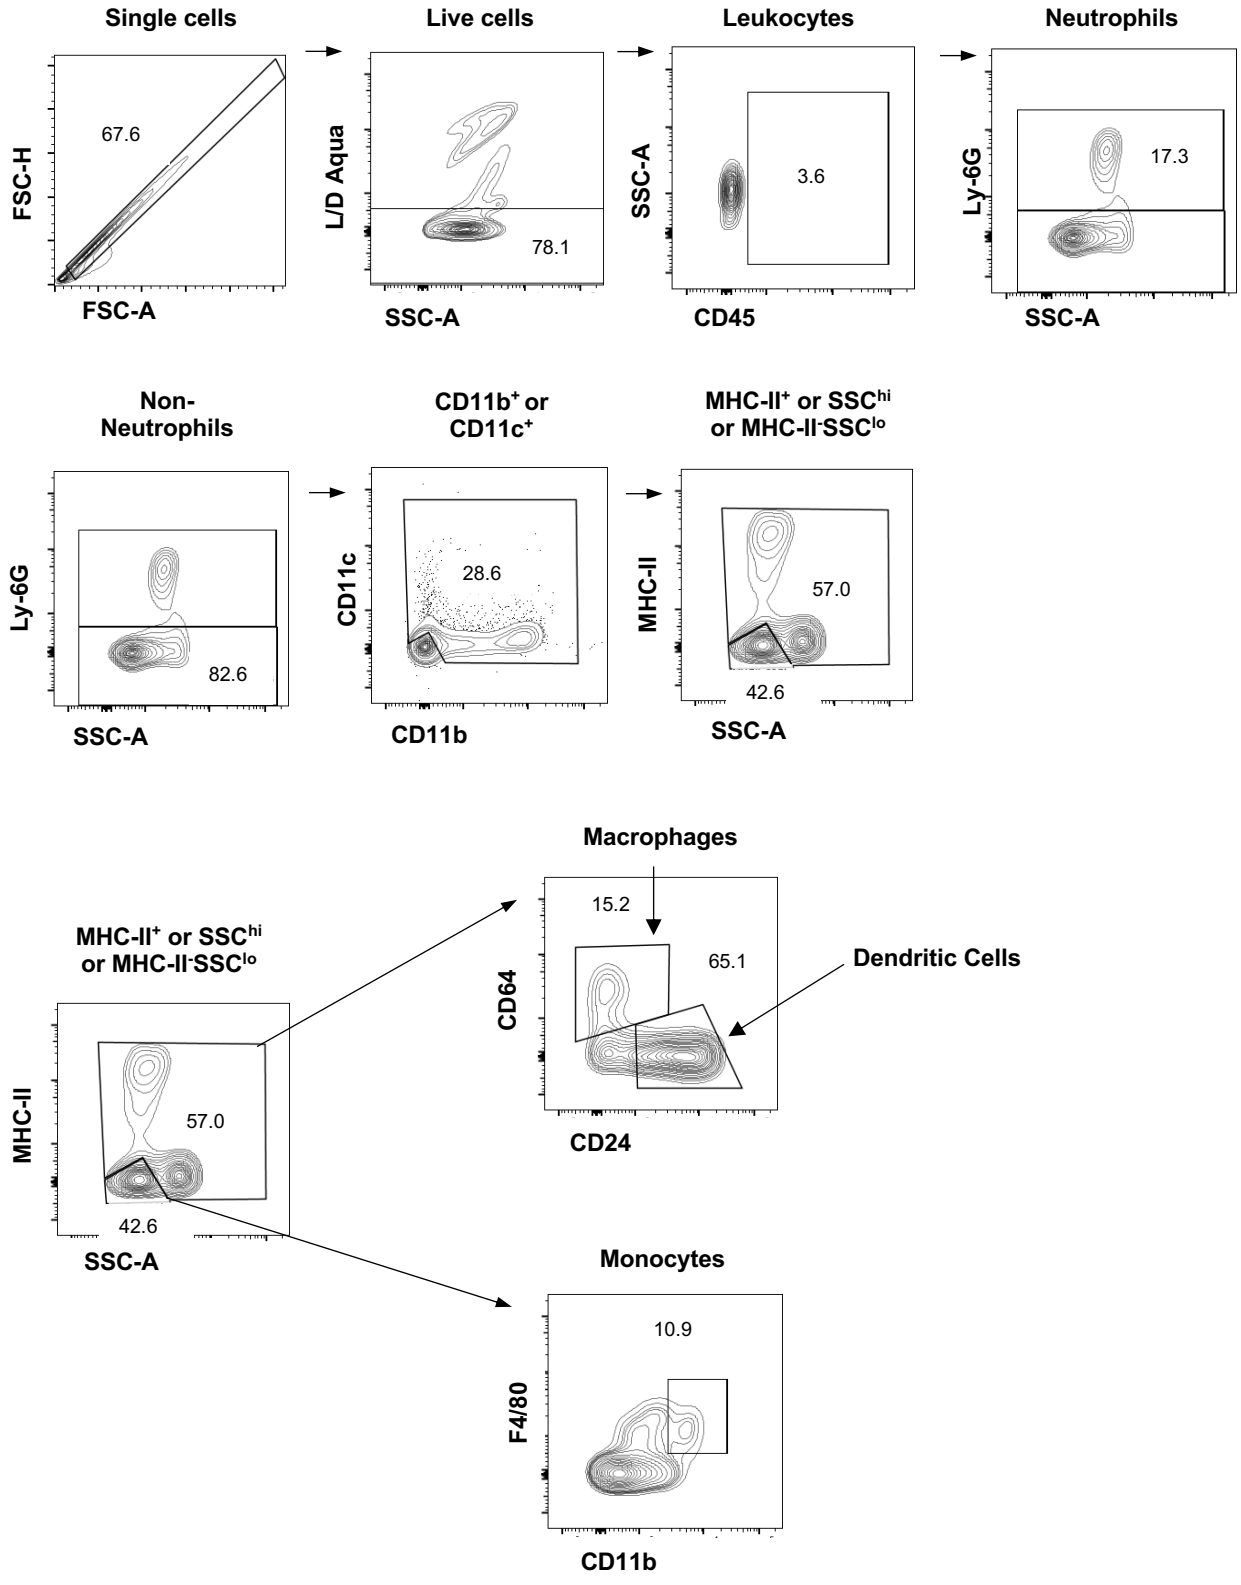

**Figure S2. Flow cytometric gating strategy for the investigation of innate immune cell responses after *OspA* mRNA-LNP and r*OspA* + alum immunizations in mice. Representative flow cytometry plots for innate immune cell populations (neutrophils, macrophages, dendritic cells, monocytes).**

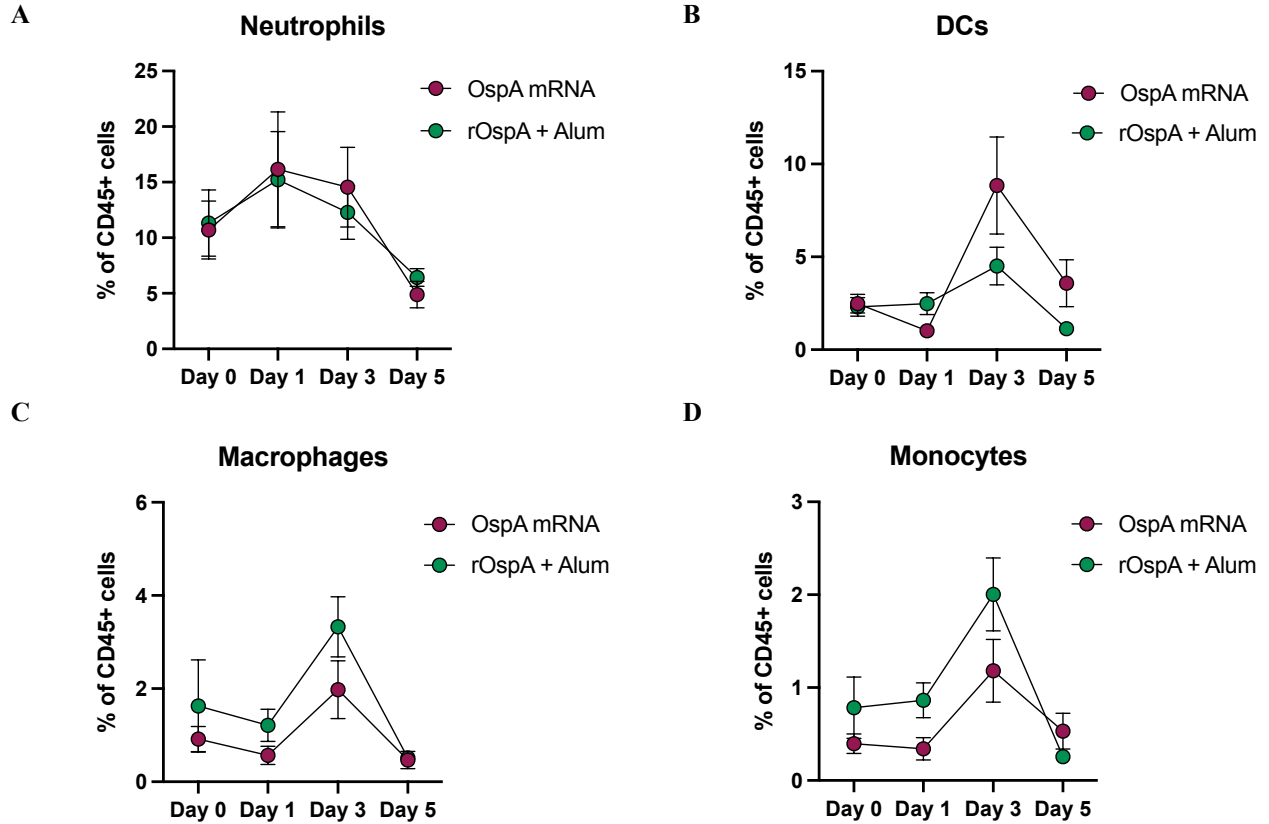

**Figure S3. Assessing innate cell populations in injection site muscle of immunized mice.** Mice were vaccinated intramuscularly with a single dose of 3  $\mu$ g of OspA mRNA-LNP or 1  $\mu$ g of rOspA + alum and innate immune cell responses were assessed 1, 3 and 5 days post injections. Non-injected mice were used as controls (day 0). Frequencies of (A) neutrophils ( $CD45^+Ly-6G^+$ ) (B) dendritic cells ( $CD45^+Ly-6G^-CD11b/CD11c^+MHCII^+/SSC^{hi}CD64^+CD24^+$ ) (C) macrophages ( $CD45^+Ly-6G^-CD11b/CD11c^+MHCII^+/SSC^{hi}CD64^+CD24^+$ ) and (D) monocytes ( $CD45^+Ly-6G^-CD11b/CD11c^+MHCII^+/SSC^{lo}CD11b^{hi}F4/80^+$ ) Data represent mean  $\pm$  SEM (n = 5 mice per group). Data from one experiment is shown.

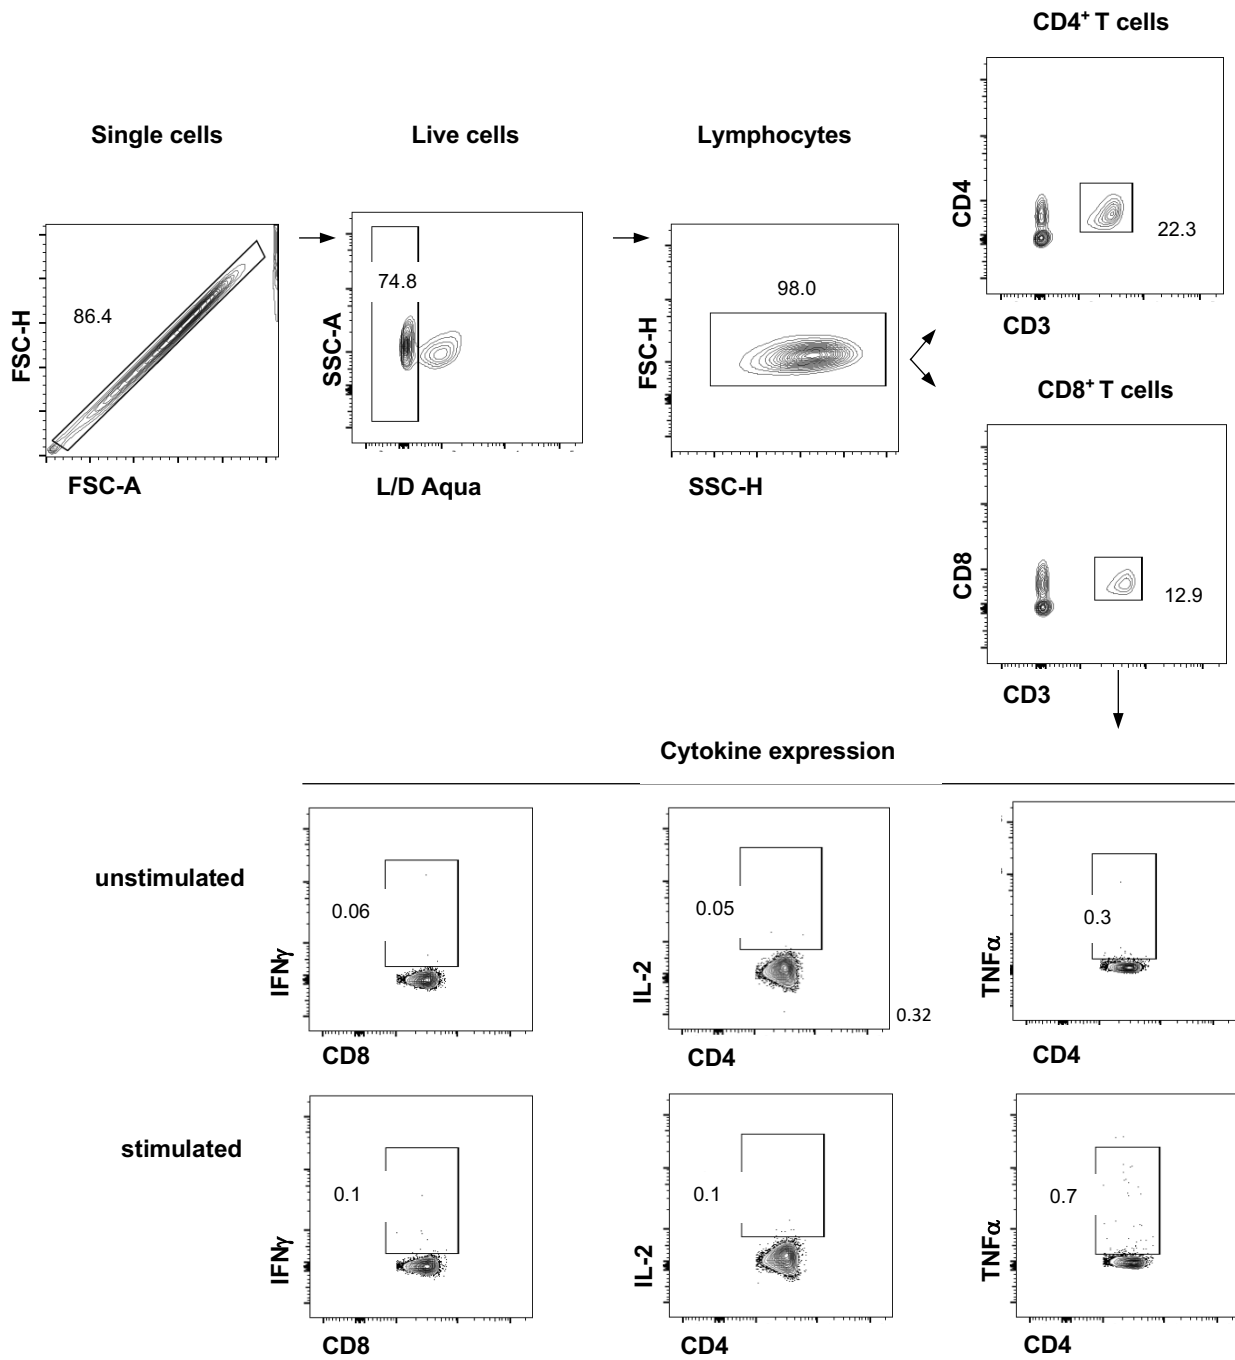

Figure S4. Flow cytometric gating strategy for the investigation of T cell responses in OspA mRNA-LNP-immunized mice. Representative flow cytometry plots for unstimulated and peptide-stimulated samples are shown.

A

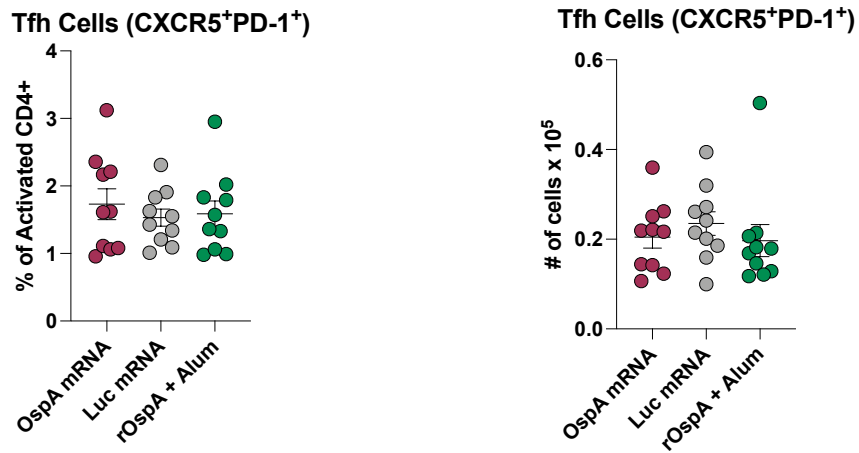

B

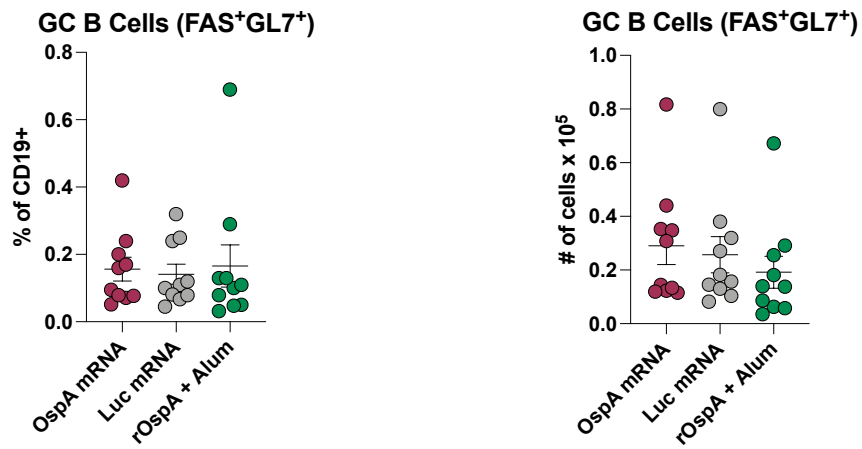

**Figure S5. Assessing T follicular helper and germinal center B cells in spleens of immunized mice.** (A) Tfh cell (B220<sup>-</sup>CD4<sup>+</sup>CD62L<sup>-</sup>PD-1<sup>+</sup>CXCR5<sup>+</sup>) frequencies (left panel) and absolute numbers (right panel). (B) GC B cell (CD19<sup>+</sup>CD3<sup>+</sup>FAS<sup>+</sup>GL7<sup>+</sup>) frequencies (left panel) and absolute numbers (right panel). Each symbol represents one animal, and data represent mean ± SEM (n = 10 mice per group). Data from two independent experiments are shown.

**A**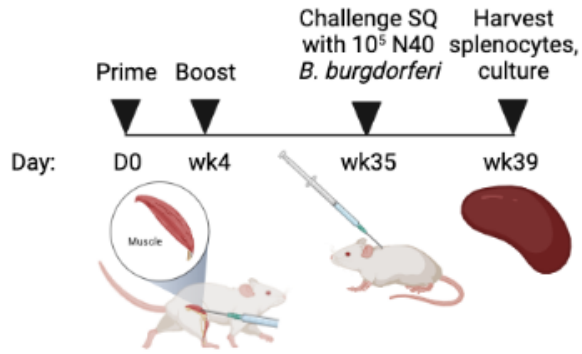**B**

| Vaccine       | Culture |
|---------------|---------|
| OspA mRNA-LNP | 0/5     |
| Luc mRNA-LNP  | 4/4     |
| rOspA + alum  | 0/5     |

**Figure S6. Nucleoside-Modified OspA mRNA-LNP immunization protects mice from infection with *Borrelia burgdorferi*** (A) Mice were vaccinated and boosted intramuscularly with OspA or Luc mRNA-LNPs or rOspA + alum as described in Figure 4. Thirty-five weeks after the prime dose, mice were challenged subcutaneously with  $10^5$  *Borrelia burgdorferi* (strain N40) and then sacrificed 25 days later. Splenocytes were cultured for detection of *B. burgdorferi* infection. (B) Number of animals with detectable *B. burgdorferi* burden five days after spleen harvest. Data is obtained from one experiment.

**Table S1. Antibodies used for innate cell flow cytometry**

| Stain   | Fluorochrome | Clone       | Vendor         | Catalog # |
|---------|--------------|-------------|----------------|-----------|
| CD11c   | BV421        | N418        | BioLegend      | 117330    |
| CD45    | BV605        | 30-F11      | BioLegend      | 103139    |
| I-A/I-E | BV650        | M5/114.15.2 | BD Biosciences | 563415    |
| CD24    | BV711        | M1/69       | BD Biosciences | 563405    |
| CD11b   | APC-Cy7      | M1/70       | BD Biosciences | 557657    |
| Ly-6G   | AF700        | 1A8         | BD Biosciences | 561236    |
| CD64    | PE-CF594     | X54-5/7.1   | BioLegend      | 139320    |
| F4/80   | PE           | BM8         | BioLegend      | 123109    |

**Table S2. Antibodies used for T follicular helper (Tfh) cell flow cytometry.**

| Stain        | Fluorochrome | Clone   | Vendor      | Catalog #  |
|--------------|--------------|---------|-------------|------------|
| CXCR5        | Biotin       | SPRCL5  | eBioscience | 13-7185-82 |
| Streptavidin | BV421        | -       | BioLegend   | 405225     |
| B220         | BV650        | RA3-6B2 | BioLegend   | 103241     |
| CD4          | PerCP-Cy5.5  | RM4-5   | BioLegend   | 100540     |
| CD44         | BV605        | IM7     | BioLegend   | 103047     |
| CD62L        | BUV395       | MEL-14  | BD          | 740218     |
| PD-1         | PE           | RMP1-30 | BioLegend   | 109104     |
| Bcl6         | AF647        | K112-91 | BD          | 624024     |
| Live/Dead    | eFluor 780   | -       | eBioscience | 65-0865-14 |

**Table S3. Antibodies used for germinal center B (GC B) cell flow cytometry.**

| Stain           | Fluorochrome | Clone     | Vendor           | Catalog #   |
|-----------------|--------------|-----------|------------------|-------------|
| CD138           | Biotin       | 281-2     | BD Biosciences   | 553713      |
| Streptavidin    | BV650        | -         | BioLegend        | 405232      |
| CD3e            | BUV395       | 145-2c11  | BD Biosciences   | 563565      |
| CD19            | BV605        | 6D5       | BioLegend        | 115540      |
| GL7             | PerCP-Cy5.5  | GL7       | BioLegend        | 144610      |
| FAS             | PE           | Jo2       | BD Biosciences   | 554258      |
| IgD             | PE-Cy7       | 11-26c.2a | BioLegend        | 405720      |
| OspA Tetramer 1 | AF488        | -         | Labeled in-house | See methods |
| OspA Tetramer 2 | AF647        | -         | Labeled in-house | See methods |
| RBD Tetramer    | BV421        | -         | Labeled in-house | See methods |
| Live/Dead       | eFluor 780   | -         | eBioscience      | 65-0865-14  |



**Table S4. Antibodies used for memory B cell (MBC) and long-lived plasma (LLPC) cell flow cytometry.**

| Stain           | Fluorochrome | Clone     | Vendor           | Catalog #   |
|-----------------|--------------|-----------|------------------|-------------|
| B220            | BV421        | RA3-6B2   | BioLegend        | 103240      |
| CD138           | BB700        | 281-2     | BD Biosciences   | 742124      |
| CD38            | AF700        | 90        | Invitrogen       | 56-0381-82  |
| IgD             | APC-Cy7      | 11-26C.2A | BioLegend        | 405716      |
| CD19            | BV711        | 6D5       | BioLegend        | 115555      |
| GL7             | PE           | GL7       | BioLegend        | 144608      |
| FAS             | PE-Cy7       | Jo2       | BD Biosciences   | 55763       |
| CD4             | PE-Cy5       | H129.19   | BD Biosciences   | 553654      |
| CD8a            | PE-Cy5       | 53-6.7    | BD Biosciences   | 553034      |
| Ter-119         | PE-Cy5       | TER119    | BioLegend        | 116210      |
| F4/80           | PE-Cy5       | BM8       | Invitrogen       | 15-4801-82  |
| OspA Tetramer 1 | AF488        | -         | Labeled in-house | See methods |
| OspA Tetramer 2 | AF657        | -         | Labeled in-house | See methods |

**Table S5. Antibodies used for long-lived plasma cell (LLPC) ELISpot assays.**

| Stain      | Conjugate            | Clone      | Vendor           | Catalog # |
|------------|----------------------|------------|------------------|-----------|
| IgG1       | biotin               | polyclonal | Southern Biotech | 1070-08   |
| IgG2a      | biotin               | polyclonal | Southern Biotech | 1080-08   |
| IgG2b      | biotin               | polyclonal | Southern Biotech | 1090-08   |
| IgG3       | biotin               | polyclonal | Southern Biotech | 1100-08   |
| ExtrAvidin | alkaline phosphatase | -          | Sigma-Aldrich    | E2636     |

**Table S6. Primers used for *Borrelia burgdorferi* detection.**

| Primer          | Sequence                |
|-----------------|-------------------------|
| <i>mactin</i> F | CATTGCTGACAGGATGCAGAAGG |
| <i>mactin</i> R | TGCTGGAAGCTGGACAGTGAGG  |
| <i>flaB</i> F   | ACAGCTGAAGAGCTTGAATG    |
| <i>flaB</i> R   | CTTGTTTGCTCCAACATGAAC   |
